# Supplementary material
Source: PubMed Central journal article supplement (PMC6246548)
Supplement: 41396_2018_240_MOESM2_ESM.pdf [file 41396_2018_240_MOESM2_ESM.pdf]

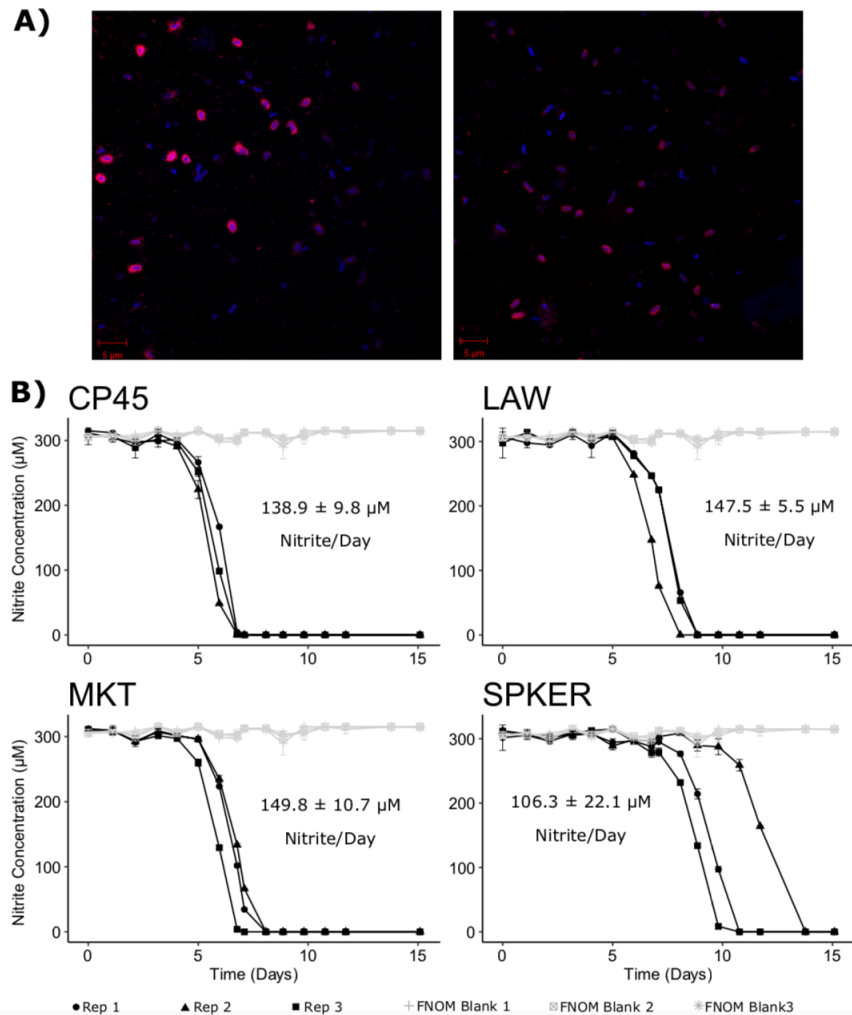

**Supplemental Figure S1.** Nitrite-oxidizing enrichment cultures showed A) hybridization with a *Ca. Nitrotoga*-specific fluorescent probe (Ntoga122) and B) consumption of nitrite over time. Representative FISH images from CP45 show Ntoga122-hybridized cells in red and all cells stained with DAPI in blue. Cells have coccoid to short rod-shaped morphology. Ring-like staining may be associated with incomplete permeabilization or a ribosome-free region of the cytoplasm, such as the large intracellular inclusions seen in other *Ca. Nitrotoga* cells. For nitrite consumption measurements, each enrichment culture was inoculated in three replicates, and nitrite concentration was quantified colorimetrically in triplicate at each time point. Error bars show the standard deviation of each time point; error bars that appear to be missing are too small to be visualized. Sterile FNOM was used as a control and plotted with each culture. Logarithmic declines in nitrite concentration were used to calculate the nitrite oxidation rate for each biological replicate. The average nitrite consumption per day is shown with standard deviation among triplicate cultures.

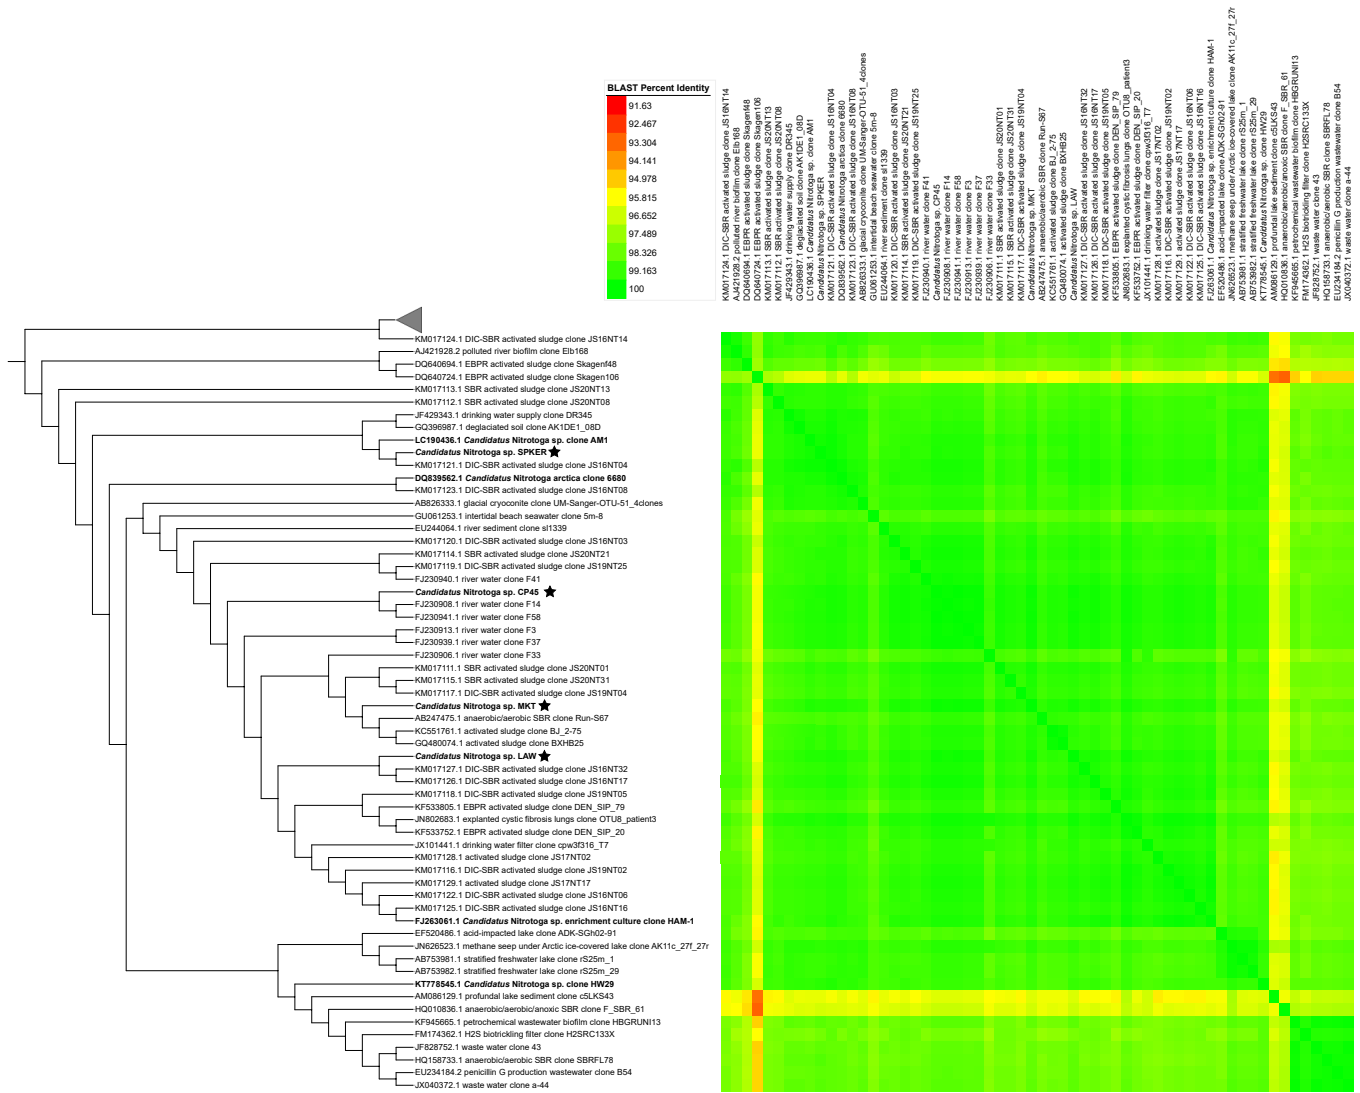

**Supplemental Figure S2.** Pairwise BLAST comparisons of 60 *Ca.Nitrotoga* and *Ca.Nitrotoga*-like 16S rRNA gene sequences  $\geq 1,300$  bp in length presented as a heatmap. The phylogeny from Figure 2 is displayed on the left with branch lengths ignored. Bolded sequence names have been enriched in culture. Nodes with a star represent organisms presented in this study.

*Ca. Nitrotoga* sp. CP45 NxrB 1 MAKVRNWQLGREMDYPYEENRPGQVSMFLDLNKCIAQCSCMTMACTTTWTAGKQ 55  
*Ca. Nitrotoga* sp. LAW NxrB 1 MAKVRNWQLGREMDYPYEENRPGQITMLFDLNKCIAQCSCMTMACTTTWTAGKQ 55  
*Ca. Nitrotoga* sp. MKT NxrB 1 MAKVRNWQLGREMDYPYEENRPGQITMLFDLNKCIAQCSCMTMACTTTWTAGKQ 55  
*Ca. Nitrotoga* sp. SPKER NxrB 1 MAKVRNWQLGREMDYPYEENRPGQVSMFLDLNKCIAQCSCMTMACTTTWTAGKQ 55  
(CBK42947.1) *Nitrospira defluvii* NxrB 1 MPEVYNWQLGRKMLYPYEEHRPKWQFAFVFNINRCLACQTCSMADKSTWLFSSKGQ 55  
(WP\_053381688.1) *Nitrospira moscoviensis* NxrB 1 MPEVYNWQLGRKMLYPYEEHRPKWQFAFVFNINRCLACQTCSMADKSTWLFSSKGQ 55  
(WP\_080885590.1) *Nitrospira japonica* NxrB 1 MPEVYNWQLGRKMLYPYEEHRPKWQFAFVFNINRCLACQTCSMADKSTWLFSSKGQ 55  
(AGF29470.1) *Nitrospina gracilis* NxrB 1 MPEVYNWQLGRMPTYVYEEKHPKEQFTFVFNINRCLACQTCMAHKSTWTFSSKGQ 55  
(KMP11422.1) *Ca. Nitromaritima* SCGC AAA799 A02 NxrB 1 MPEVYNWQLGRMPTYVYDEKHPKEQFTFVFNINRCLACQTCMAHKSTWTFSSKGQ 55  
(AAR92470.1) *Nitrobacter winogradskyi* NxrB 1 -----MDIRAQVSMVFHLDKCIGCHTCSIACKNIWTDKRGQ 55  
(WP\_005004545.1) *Nitrococcus mobilis* NxrB 1 -----MDIRAQVSMVFHLDKCIGCHTCSIACKNIWTDKRGQ 55  
(CCF85658.1) *Nitrolancea hollandica* NxrB 1 -----MDIRAQVSMVFHLDKCIGCHTCSIACKNIWTDKRGQ 55  
(CRI68047.1) *Thiocapsa* sp. KS1 NxrB 1 -----MRIQQMGIVFNLDKCLGQCTIACKNVWTNREGA 55  
  
*Ca. Nitrotoga* sp. CP45 NxrB 206 KNWGFPPRICNHCTFPGCLAACPRKAIYKRQEDGIVLIDASRCRGYRECVAAACP 260  
*Ca. Nitrotoga* sp. LAW NxrB 206 KNWGFPPRICNHCTFPGCLAACPRKAIYKRQEDGIVLIDASRCRGYRECVAAACP 260  
*Ca. Nitrotoga* sp. MKT NxrB 206 KNWGFPPRICNHCTFPGCLAACPRKAIYKRQEDGIVLIDASRCRGYRECVAAACP 260  
*Ca. Nitrotoga* sp. SPKER NxrB 206 KNWGFPPRICNHCTFPGCLAACPRKAIYKRQEDGIVLIDASRCRGYRECVAAACP 260  
(CBK42947.1) *Nitrospira defluvii* NxrB 206 ETFFFYLRICNHCTYPGCLAACPRKAIYKRPEDEGIVLIDQNRRCRGYKCKVEQCP 260  
(WP\_053381688.1) *Nitrospira moscoviensis* NxrB 206 ETFFFYLRICNHCTYPGCLAACPRKAIYKRPEDEGIVLIDQNRRCRGYKCKVEQCP 260  
(WP\_080885590.1) *Nitrospira japonica* NxrB 206 ETFFFYLRICNHCTYPGCLAACPRKAIYKRPEDEGIVLIDQNRRCRGYKCKVEQCP 260  
(AGF29470.1) *Nitrospina gracilis* NxrB 206 KIWFYLRICNHCTYPGCLAACPRKAIYKRQEDGIVLIDQSRRCRGYKCKVEQCP 260  
(KMP11422.1) *Ca. Nitromaritima* SCGC AAA799 A02 NxrB 206 KIWFYLRICNHCTYPGCLAACPRKAIYKRQEDGIVLIDQSRRCRGYKCKVEQCP 260  
(AAR92470.1) *Nitrobacter winogradskyi* NxrB 206 STVFFYLPRICNHCLNPGCVAACPQALYKRGEDGVVLSQERCRAWRMCVSGCP 260  
(WP\_005004545.1) *Nitrococcus mobilis* NxrB 206 QTVFFYLPRICNHCLNPGCVAACPAGAIYKRGEDGIVLISQNRCAWRMVCVSGCP 260  
(CCF85658.1) *Nitrolancea hollandica* NxrB 206 RLIFFFYLPRICNHCLNPGCVAACPAGAIYKRGEDGIVLISQEKCAWRMVCVSGCP 260  
(CRI68047.1) *Thiocapsa* sp. KS1 NxrB 206 NSFMMYLRICNHCLNPA CVGSCPSGANIKREEDGVVLDQDRCRGWRYCVSGCP 260  
  
*Ca. Nitrotoga* sp. CP45 NxrB 261 YKKSFYNDTTRTGEKCI SCYPKVEAG-----LMTQCVTQ CIGKIRLFGFKSA 315  
*Ca. Nitrotoga* sp. LAW NxrB 261 YKKSFYNDTTRTGEKCI SCYPKVEAG-----LMTQCVTQ CIGKIRLNGFKSA 315  
*Ca. Nitrotoga* sp. MKT NxrB 261 YKKSFYNDTTRTGEKCI SCYPKIEAG-----LMTQCTTQ CIGKIRLNGFKSA 315  
*Ca. Nitrotoga* sp. SPKER NxrB 261 YKKSFYNDTTRTGEKCI SCYPKVEAG-----LMTQCVTQ CIGKIRLFGFKSA 315  
(CBK42947.1) *Nitrospira defluvii* NxrB 261 FKKPMYRGTTTRVSEKCIACYPRIEGKDLPTGGPEMETRCMAACVKGIRMQSLMRI 315  
(WP\_053381688.1) *Nitrospira moscoviensis* NxrB 261 FKKPMYRGTTTRVSEKCIACYPRIEGKDLPTGGPEMETRCMAACVKGIRMQSLMRI 315  
(WP\_080885590.1) *Nitrospira japonica* NxrB 261 FKKPMYRGTTTRVSEKCIACYPRIEGKDLPTGGPEMETRCMAACVKGIRMQSLMRI 315  
(AGF29470.1) *Nitrospina gracilis* NxrB 261 YKKPMFRGTTRISEKCIACYPRIEGLDPLTEGDQMETRCMAACVKGIRLQGLVKI 315  
(KMP11422.1) *Ca. Nitromaritima* SCGC AAA799 A02 NxrB 261 YKKPMFRGTTRISEKCIACYPRIEGLDPLTEGDQMETRCMAACVKGIRLQGLVKV 315  
(AAR92470.1) *Nitrobacter winogradskyi* NxrB 261 YKKTFFYNWSTGKAEKCI LCYPRIEGLDPLTEGDQMETRCMAACVGRIRYIGLVLY 315  
(WP\_005004545.1) *Nitrococcus mobilis* NxrB 261 YKKTFFYNWSTGKAEKCI LCYPRIEGLDPLTEGDQMETRCMAACVGRIRYIGLVLY 315  
(CCF85658.1) *Nitrolancea hollandica* NxrB 261 YKKTFFYNWSTGKSEKCI LCYPRIEGLDPLTEGDQMETRCMAACVGRIRYIGLVLY 315  
(CRI68047.1) *Thiocapsa* sp. KS1 NxrB 261 YKKTFFYNWSTGKSEKCI LCYPRIEGLDPLTEGDQMETRCMAACVGRIRYIGLVLY 315

**Supplemental Figure S3.** Partial alignment of important residues from selected NxrB subunits representing the *Ca. Nitrotoga* (Red), as well as canonical periplasmic-facing (Purple) and cytoplasmic-facing (Blue/Green) NXR. Highlights represent Fe-S cluster binding residues (Yellow).

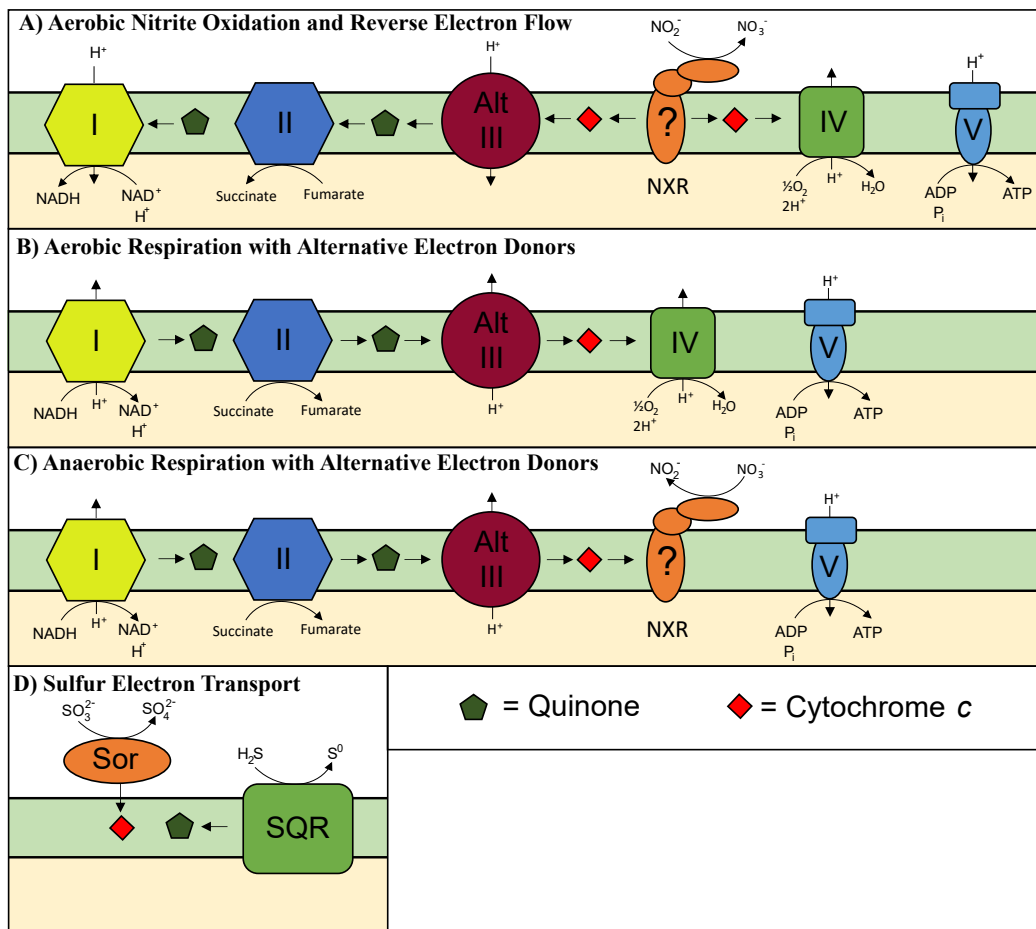

**Supplemental Figure S4.** Schematic of electron transfer in *Ca. Nitrotoga* based on genomic evidence. **A)** Canonical nitrite oxidation performed by NXR will liberate two electrons onto cytochrome c and flow forwards to the terminal oxidase (Complex IV), or backwards to regenerate NADH via Alternative Complex III and the quinone pool, or to generate biochemical intermediates via Complex II. The question mark located in the NxrC subunit symbolizes the uncertainty in whether or not the holoenzyme is anchored to the cell membrane. **B)** Aerobic respiration with alternative electron donors such as NADH derived from organic carbon utilization. **C)** Hypothesized anaerobic respiration with alternative electron donors (e.g., NADH) with the reduction of nitrate to nitrite via NXR as seen for other NOB. **D)** Electrons derived from reduced sulfur compounds (sulfites or sulfides) are transferred to cytochrome c or quinone, which can enter at any point in electron transfer shown in panels B or C.

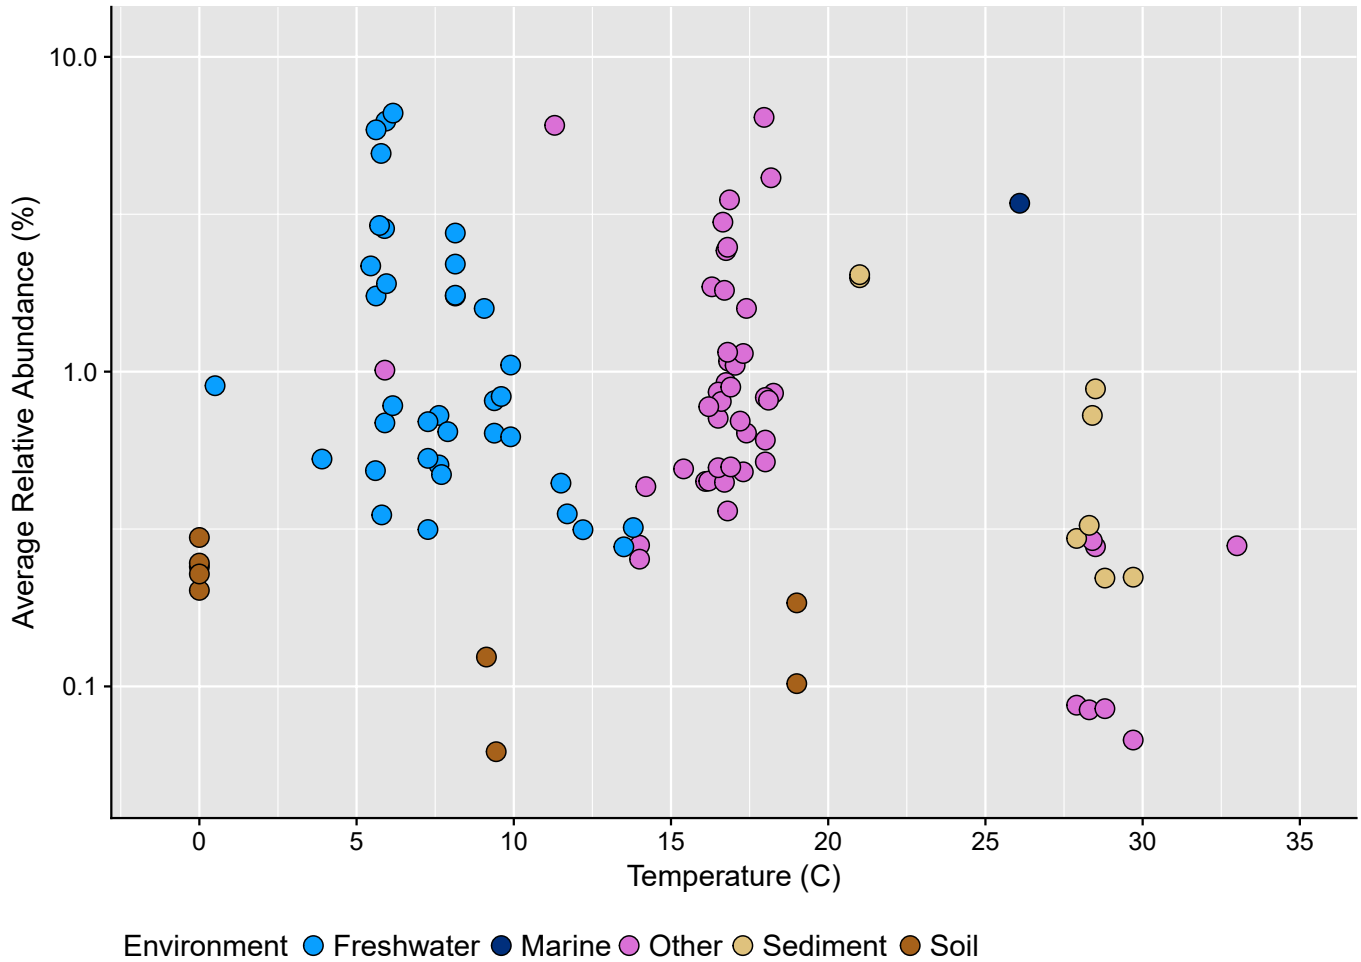

**Supplemental Figure S5.** Analysis of *Ca. Nitrotoga*-like OTUs from public 16S rRNA gene amplicon studies (deposited as SRA runs; clustered at  $\geq 97\%$  identity by IMNGS) with available environmental temperature metadata. Temperature data was extracted from 101 unique BioSamples from all SRA runs with *Ca. Nitrotoga*-like OTUs, and plotted against the average relative abundance of *Ca. Nitrotoga*-like OTUs. Average relative abundance was calculated across the four queried *Ca. Nitrotoga* 16S rRNA gene sequences after instances with  $< 100$  reads were removed.

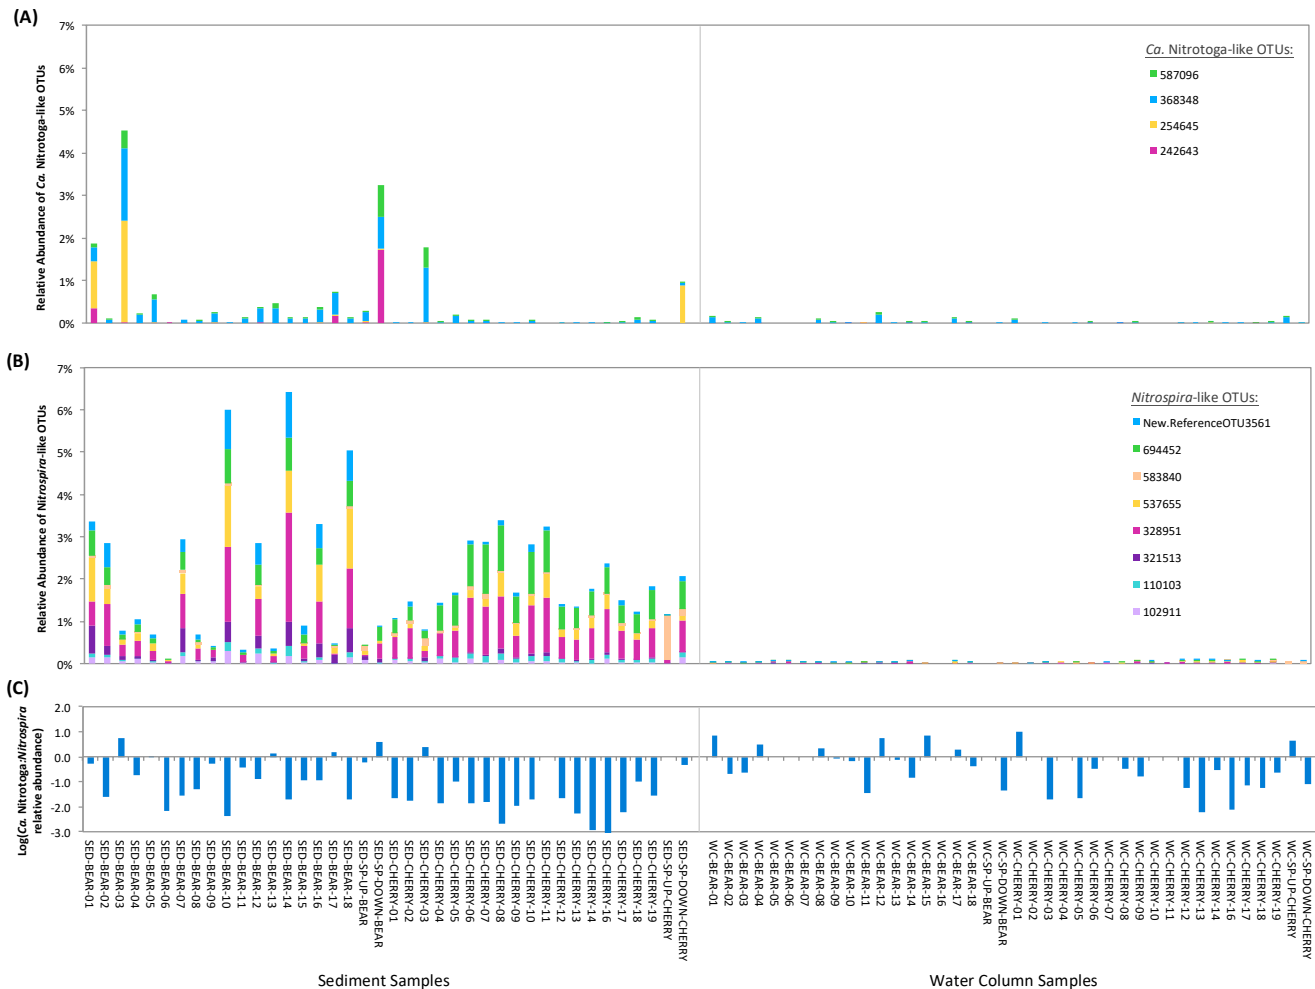

**Supplemental Figure S6.** Relative abundance of **A)** *Ca. Nitrotoga*- and **B)** *Nitrospira*-like 16S rRNA gene sequence OTUs from water column (“WC”) and sediment (“SED”) samples in Bear Creek (“BEAR”), Cherry Creek (“CHERRY”), and the upstream (“SP-UP”) and downstream (“SP-DOWN”) sites at their respective confluences with the South Platte River. OTUs were based on the amplification with general 16S rRNA gene primers targeting the total bacterial community and were grouped at 97% nucleotide identity. *Ca. Nitrotoga* and *Nitrospira* OTUs were identified based on BLAST searches against the SILVA rRNA gene database. **C)** Log ratio of the summed relative abundance of *Ca. Nitrotoga*- to *Nitrospira*-like 16S rRNA gene sequences.
