# Supplementary material
Source: PubMed Central journal article supplement (PMC6246548)
Supplement: 41396_2018_240_MOESM3_ESM.pdf [file 41396_2018_240_MOESM3_ESM.pdf]

**Supplemental Table S1.** Assembly statistics overview for *Ca. Nitrotoga* genomes. Percent completeness and contamination were estimated using CheckM. The asterisks indicate manual assignment of some marker genes used in completeness estimates (see Supplemental Note).

|                                       | <b>Num. Contigs</b> | <b>GC %</b> | <b>N50 (bp)</b> | <b>Median Contig Length (bp)</b> | <b>Total Length (bp)</b> | <b>CDS</b> | <b>tRNA</b> | <b>rRNA</b> | <b>% Complete*</b> | <b>% Contamination</b> |
|---------------------------------------|---------------------|-------------|-----------------|----------------------------------|--------------------------|------------|-------------|-------------|--------------------|------------------------|
| <b><i>Ca. Nitrotoga</i> sp. CP45</b>  | 59                  | 48.8%       | 69,731          | 35,034                           | 2,816,237                | 2,665      | 36          | 6           | 99.8%              | 0.30%                  |
| <b><i>Ca. Nitrotoga</i> sp. LAW</b>   | 33                  | 48.7%       | 123,222         | 58,971                           | 2,814,534                | 2,676      | 37          | 6           | 99.8%              | 0.30%                  |
| <b><i>Ca. Nitrotoga</i> sp. MKT</b>   | 23                  | 48.6%       | 214,834         | 70,433                           | 2,707,194                | 2,526      | 39          | 6           | 99.8%              | 0.30%                  |
| <b><i>Ca. Nitrotoga</i> sp. SPKER</b> | 32                  | 47.5%       | 168,712         | 48,253                           | 2,982,257                | 2,799      | 39          | 6           | 99.8%              | 0.24%                  |

**Supplemental Table S2.** Summary table comparing key functions predicted within members of the major NOB groups.\*

| <b>Predicted Function</b> | <i>Ca. Nitrotoga</i>                 | <i>Nitrospira</i>             | <i>Nitrobacter</i>    | <i>Nitrospina</i>      | <i>Nitrococcus</i>    | <i>Nitrolancea</i>    |
|---------------------------|--------------------------------------|-------------------------------|-----------------------|------------------------|-----------------------|-----------------------|
| Terminal oxidase          | <i>cbb<sub>3</sub></i> and <i>bd</i> | <i>bd</i> and <i>bd</i> -like | <i>aa<sub>3</sub></i> | <i>cbb<sub>3</sub></i> | <i>aa<sub>3</sub></i> | <i>aa<sub>3</sub></i> |
| Nitrate reduction         | yes                                  | yes                           | yes                   | <i>n.d.</i>            | yes                   | yes                   |
| Carbon fixation           | Calvin cycle                         | rTCA cycle                    | Calvin cycle          | rTCA cycle             | Calvin cycle          | Calvin cycle          |
| Heterotrophy              | yes                                  | yes                           | yes                   | yes                    | yes                   | yes                   |
| Formate dehydrogenase     | no                                   | yes                           | yes                   | no                     | yes                   | yes                   |
| Sulfite oxidation         | yes                                  | yes                           | no                    | yes                    | yes                   | no                    |
| Hydrogenase               | yes                                  | yes                           | <i>n.d.</i>           | yes                    | yes                   | yes                   |
| Urea degradation          | no                                   | yes                           | no                    | no                     | no                    | no                    |
| Cyanate degradation       | no                                   | yes                           | yes                   | yes                    | yes                   | yes                   |
| Siderophore production    | no                                   | yes                           | yes                   | yes                    | possible              | <i>n.d.</i>           |
| Flagellum                 | yes                                  | yes                           | yes                   | yes                    | yes                   | no                    |
| Quorum Sensing            | yes                                  | yes                           | yes                   | no                     | yes                   | <i>n.d.</i>           |
| EPS Production            | yes                                  | yes                           | yes                   | <i>n.d.</i>            | <i>n.d.</i>           | <i>n.d.</i>           |

\*See review by Daims *et al.*, 2016 and references within.

*n.d.* refers to features that are uncertain or were not evaluated in the published references.

**16S\_rRNA\_gene\_accessions:**

JF429343.1  
GQ396987.1  
KM017113.1  
KM017124.1  
DQ640724.1  
DQ640694.1  
AJ421928.2  
AB826333.1  
EF520486.1  
AB753981.1  
JN626523.1  
AB753982.1  
KT778545.1  
AM086129.1  
HQ010836.1  
HQ158733.1  
KF945665.1  
JF828752.1  
EU234184.2  
JX040372.1  
FM174362.1  
KM017123.1  
KM017112.1  
KM017121.1  
DQ839562.1  
KM017127.1  
KM017126.1  
KF533805.1  
KF533752.1  
JN802683.1  
KM017118.1  
KM017128.1  
KM017125.1  
JX101441.1  
KM017116.1  
FJ263061.1  
KM017122.1  
KM017129.1  
KM017111.1  
FJ230913.1  
FJ230939.1  
KM017115.1  
KM017120.1  
KM017119.1  
FJ230941.1  
FJ230908.1  
FJ230940.1  
FJ230906.1  
KM017114.1  
EU244064.1  
KM017117.1  
GU061253.1  
AB247475.1  
KC551761.1  
GQ480074.1  
LC190436.1  
L07897.1  
DQ386262.1  
DQ386264.1  
DQ386858.1  
DQ386859.1  
FJ391492.1  
FJ391498.1  
JX308273.1

**Type II\_DMSO\_protein\_accessions:**

WP\_005557333.1  
KRT71940.1  
WP\_012964344.1  
OHB89378.1  
ARPS3735.1  
WP\_006671140.1  
WP\_005553455.1  
WP\_015320288.1  
WP\_090306927.1  
WP\_049927103.1  
WP\_008426537.1  
WP\_008895484.1  
WP\_012942830.1  
WP\_049923369.1  
WP\_013880708.1  
WP\_090615652.1  
WP\_007701576.1  
WP\_006652972.1  
WP\_071400145.1  
WP\_006166072.1  
AGBS3389.1  
WP\_006649791.1  
WP\_007142113.1  
WP\_089784439.1  
WP\_014030951.1  
WP\_015910069.1  
WP\_006671327.1  
WP\_012459851.1  
Q9S1H0.1  
P60068.1  
WP\_012173623.1  
WP\_028989412.1  
WP\_004513191.1  
KPQ43397.1  
EQB62431.1  
KRT68883.1  
WP\_012470696.1  
WP\_012662440.1  
WP\_005024327.1  
CAF21906.1  
WP\_011509502.1  
WP\_011511827.1  
WP\_041359063.1  
WP\_011314088.1  
WP\_011315305.1  
WP\_004998773.1  
WP\_005004540.1  
CHE67843.1  
WP\_012468292.1  
WP\_012132377.1  
WP\_000040373.1  
WP\_012017453.1  
WP\_011365654.1  
WP\_004512301.1  
CAA71210.2  
WP\_010877688.1  
YP\_430751.1  
CRI68048.1  
WP\_011344974.1  
WP\_011879804.1  
WP\_089723899.1  
OQY55899.1  
KCZ70344.1  
KMP11423.1  
WP\_048492943.1  
WP\_042250442.1  
WP\_042251421.1  
WP\_015257936.1  
WP\_018861559.1  
WP\_018868538.1  
WP\_018863956.1  
WP\_019624109.1  
WP\_040333786.1  
KJU86102.1  
KHE93157.1  
CAJ72445.1  
WP\_052562588.1  
WP\_096601733.1  
WP\_012513384.1  
WP\_052491869.1  
OQW90655.1  
ACL65121.1  
ACG72937.1  
GAO02124.1  
ABC81940.1  
WP\_09297472.1  
SNQ62035.1  
WP\_062483509.1  
CUS33249.1  
WP\_053378142.1  
WP\_053381280.1  
WP\_053381686.1  
WP\_053381689.1  
WP\_053381277.1  
WP\_080886776.1  
CUS31266.1  
WP\_080885591.1  
WP\_013249749.1  
WP\_013249767.1  
CUS38776.1  
WP\_080885705.1  
OHB90204.1  
Q8GPG4.1  
WP\_011223493.1  
AAO49008.1  
AFE03185.1  
Q47CW6.1  
WP\_018232354.1  
ASV74111.1  
AAK76387.1  
JQ279817  
JQ279818.1  
JQ279819.1  
JQ279820.1
